# ▶ PODCASTS from APA Publishing

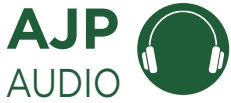

## AJP Audio

Host: Michael D. Roy, Executive Editor, *The American Journal of Psychiatry*

Each episode features an in-depth interview with an author from the most discussed article appearing in the latest issue of *The American Journal of Psychiatry*.

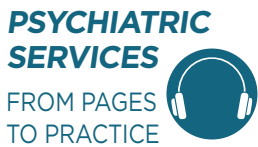

## Psychiatric Services From Pages to Practice

Hosts: Lisa Dixon, M.D., M.P.H., Editor, *Psychiatric Services*, and Josh Berezin, M.D., M.S.

Learn about the latest mental health services research published in *Psychiatric Services* and why it is relevant. Topics include community-based treatment programs, collaborative care, evidence-based treatment and service delivery, criminal and social justice, policy analysis, and more.

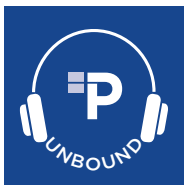

## Psychiatry Unbound

Host: Laura Roberts, M.D., M.A., Editor-in-Chief, APA Publishing Books

APA Publishing's Books podcast offers the opportunity to hear the voices behind the most prominent psychiatric scholarship in the field today. Learn about important topics in the field of psychiatry and see how our authors are making an impact in clinical settings throughout the world.

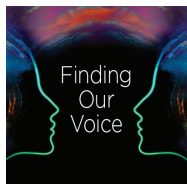

## Finding Our Voice

Host: Sanya Virani, MBBS, MPH

*Finding Our Voice* brings the viewpoints and opinions of the next generation of psychiatrists—including residents, fellows, and early career psychiatrists—to the forefront. Topics covered include systemic racism and social determinants.

Subscribe Today!

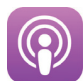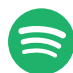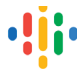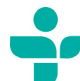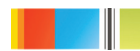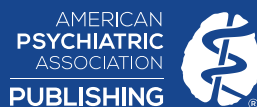

# NEW TITLES in PSYCHIATRY

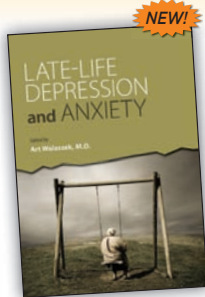

**NEW!**

## Late-Life Depression and Anxiety

Edited by Art Walaszek, M.D.

This book empowers health care professionals to accurately identify and diagnose anxiety and depression in older adult patients and help them find relief, stay independent, and lower their risk of suicide. The book discusses dependable assessment methods that consider multiple factors of mental health, including medical, behavioral, personal, social, and spiritual and provides guidance on culturally sensitive care to geriatric patients of diverse races, ethnicities, gender identities and sexual orientations, and intellectual abilities.

2022 • 376 pages • ISBN 978-1-61537-347-5 • Paperback • \$69.00 • Item #37347  
2022 • 376 pages • ISBN 978-1-61537-441-0 • eBook • \$55.00 • Item #37441

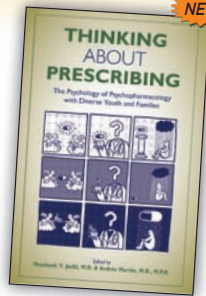

**NEW!**

## Thinking About Prescribing The Psychology of Psychopharmacology With Diverse Youth and Families

Edited by Shashank V. Joshi, M.D., FAAP,  
DFAACAP, and Andrés Martin, M.D., M.P.H.

This volume makes the case for an ongoing alliance between psychopharmacotherapists, young patients, and their families. Chapters tackle issues ranging from the psychodynamics of medication use in adolescents with serious mental illness, the synergistic role of primary care providers and psychotherapists, engaging in psychoeducation with patients, to prescribing via telemedicine. Readers will pick up the foundational knowledge they need to develop a partnership with patients that is based on trust and candid communication—rather than on just the cold facts of psychotropic medications.

2022 • 395 pages • ISBN 978-1-61537-388-8 • Paperback • \$65.00 • Item #37388  
2022 • 395 pages • ISBN 978-1-61537-389-5 • eBook • \$52.00 • Item #37389

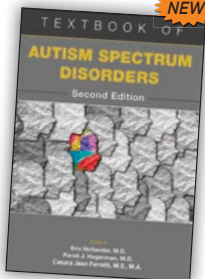

**NEW!**

## Textbook of Autism Spectrum Disorders, Second Edition

Edited by Eric Hollander, M.D.,  
Randi Hagerman, M.D., and Casara Ferretti, M.S.

Unrivaled in its thoroughness, this volume discusses issues of assessment and evaluation; examines the etiology of autism spectrum disorder and its recognized associations with other medical conditions; analyzes standard and experimental treatments; and delves into social policy issues pertinent to individuals with autism spectrum disorder and those who treat them. With summary points in each chapter and copious lists of recommended readings,

this is an indispensable resource.

2022 • 752 pages • ISBN 978-1-61537-304-8 • Hardcover • \$115.00 • Item #37304  
2022 • 752 pages • ISBN 978-1-61537-421-2 • eBook • \$85.00 • Item #37421

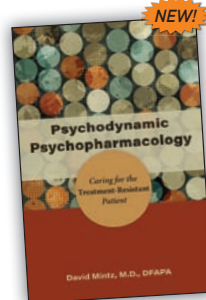

**NEW!**

## Psychodynamic Psychopharmacology Caring for the Treatment-Resistant Patient

David Mintz, M.D.

This new guide emphasizes integrating research on evidence-based prescribing processes with psychodynamic insights and skills to enhance and optimize treatment outcomes with difficult-to-treat patients. The book examines the incidence and nature of pharmacological treatment resistance, exploring common psychodynamics that contribute to resistance and preparing readers to better understand and formulate the processes that interfere with the healthy use of medications.

2022 • 295 pages • ISBN 978-1-61537-152-5 • Paperback • \$62.00 • Item #37152  
2022 • 295 pages • ISBN 978-1-61537-400-7 • eBook • \$49.95 • Item #37400

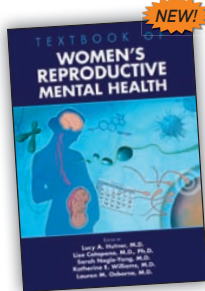

**NEW!**

## Textbook of Women's Reproductive Mental Health

Edited by Lucy A. Hutner, M.D.,  
Lisa A. Catapano, M.D., Ph.D.,  
Sarah M. Nagle-Yang, M.D.,  
Katherine E. Williams, M.D.,  
and Lauren M. Osborne, M.D.

This is the first definitive guide to understanding, diagnosing, and treating the unique mental health needs of women and others who undergo female reproductive transitions during their reproductive lives. The book provides real-world insights into the mental, emotional,

and behavioral disturbances related to female reproductive stages—how these disorders present themselves, the underlying causes of specific conditions, and the latest evidence-based guidance for treatment.

2022 • 784 pages • ISBN 978-1-61537-306-2 • Hardcover • \$135.00 • Item #37306  
2022 • 784 pages • ISBN 978-1-61537-386-4 • eBook • \$108.00 • Item #37386

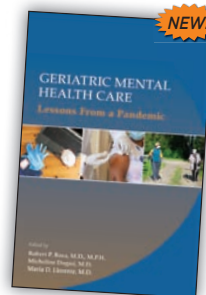

**NEW!**

## Geriatric Mental Health Care Lessons from a Pandemic

Edited by Robert P. Roca, M.D., M.P.H.,  
Micheline Dugue, M.D.,  
and Maria Llorente, M.D., FAPA

The effects of the COVID-19 pandemic on older adults have been well documented. In the case of older patients with mental illness, these challenges are magnified. The authors of this volume seek to share emerging practices that clinicians and systems can emulate. Introductory case vignettes, easily referenced key takeaways, and multiple-choice questions designed to reinforce learning offer detailed descriptions of clinical and social innovations to mitigate the impact of the pandemic on older patients.

2022 • 384 pages • ISBN 978-1-61537-465-6 • Paperback • \$58.00 • Item #37465  
2022 • 384 pages • ISBN 978-1-61537-466-3 • eBook • \$46.50 • Item #37466

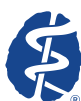



Searching for  
the perfect  
psychiatric  
career?

## Let APA JobCentral help!

### Manage Your Career

- Browse hundreds of active job listings!
- Create an account to save jobs, store multiple resumes and cover letters and communicate with employers through our internal messaging system.
- Set up multiple job alerts specifying your skills, interests and location to receive e-mails when employers post jobs that match your criteria.

### Recruit for Open Positions

- Post your job in front of thousands of highly qualified psychiatrists.
- Cross promote your job listing in Psychiatric News.
- Search the anonymous resume database to find your ideal candidate.

AMERICAN  
**PSYCHIATRIC**  
ASSOCIATION

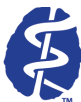

**JOBCENTRAL**  
The Career Hub for Psychiatry

[jobs.psychiatry.org](https://jobs.psychiatry.org)

# PSYCHIATRYonline

Your Destination for Lifelong Learning in Psychiatry

The one-stop resource for information on diagnosis, treatment, guidelines, the latest research, and breaking news from the field.

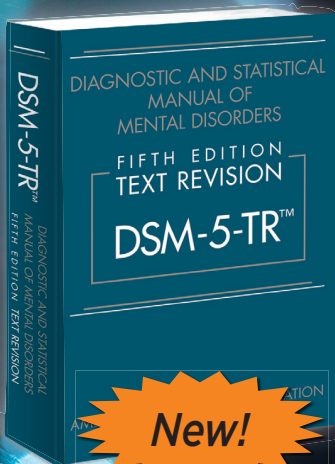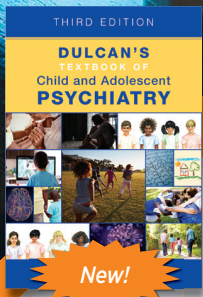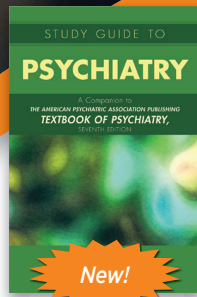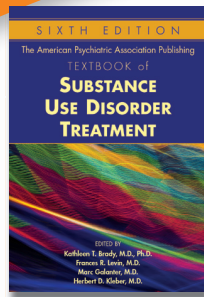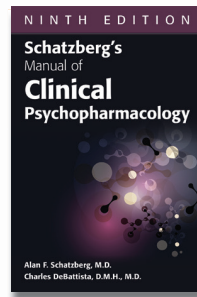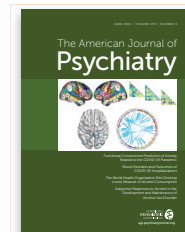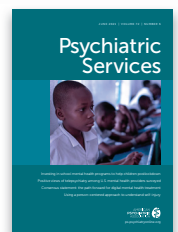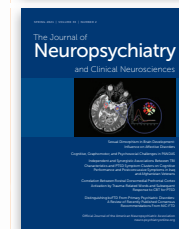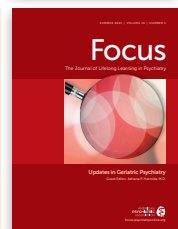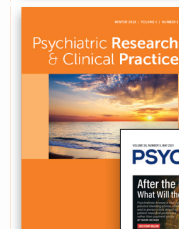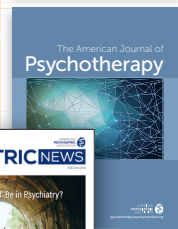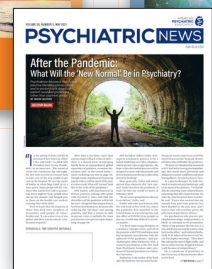

**PsychiatryOnline.org** is the platform for all American Psychiatric Association Publishing journals, *DSM-5-TR™*, and bestselling textbooks, as well as APA Practice Guidelines, and continuing medical education.

This is a one-stop resource for information on psychiatric diagnosis, treatment, guidelines, the latest research, and breaking news from the field. From a single location, users can search across all books and journals to find the most relevant content easier than ever.

Subscribe to products individually or to the DSM Select package that includes the DSM-5® library, books and select journals.

**Go to [www.appi.org](http://www.appi.org) to subscribe.**

*Institutional subscription options are available.*

*For more information contact: [institutions@psych.org](mailto:institutions@psych.org);  
800-368-5777 ext. 3729*

**New!**

# Diagnostic and Statistical Manual of Mental Disorders, Fifth Edition, Text Revision (DSM-5-TR™)

American Psychiatric Association

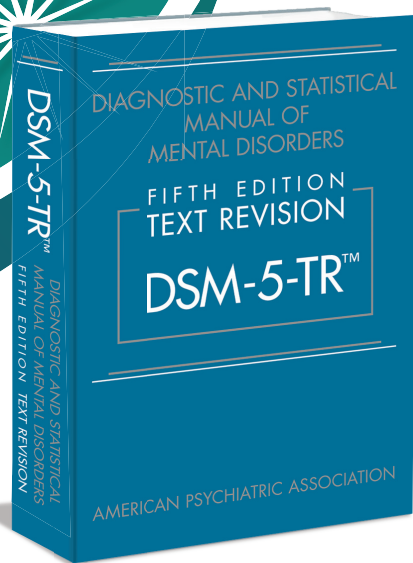

The *Diagnostic and Statistical Manual of Mental Disorders*, Fifth Edition, Text Revision (DSM-5-TR), is the most comprehensive, current, and critical resource for clinical practice available to today's mental health clinicians and researchers. DSM-5-TR includes the fully revised text and references, updated diagnostic criteria and ICD-10-CM codes since DSM-5 was published in 2013. It features a new disorder, Prolonged Grief Disorder, as well as codes for suicidal behavior available to all clinicians of any discipline without the requirement of any other diagnosis.

With contributions from over 200 subject matter experts, this updated volume boasts the most current text updates based on the scientific literature. Now in four-color and with the ability to authenticate each printed copy, DSM-5-TR provides a cohesive, updated presentation

of criteria, diagnostic codes, and text. This latest volume offers a common language for clinicians involved in the diagnosis and study of mental disorders and facilitates an objective assessment of symptom presentations across a variety of clinical settings—inpatient, outpatient, partial hospital, consultation-liaison, clinical, private practice, and primary care.

## Stay current with these important updates to DSM-5-TR™:

- Fully revised text for each disorder with updated sections on associated features, prevalence, development and course, risk and prognostic factors, culture, diagnostic markers, suicide, differential diagnosis, and more.
- Addition of Prolonged Grief Disorder (PGD) to Section II—a new disorder for diagnosis
- Over 70 modified criteria sets with helpful clarifications since publication of DSM-5
- Fully updated Introduction and Use of the Manual to guide usage and provide context for important terminology
- Considerations of the impact of racism and discrimination on mental disorders integrated into the text
- New codes to flag and monitor suicidal behavior, available to all clinicians of any discipline and without the requirement of any other diagnosis
- Fully updated ICD-10-CM codes implemented since 2013, including over 50 coding updates new to DSM-5-TR for substance intoxication and withdrawal and other disorders
- Updated and redesigned Diagnostic Classification

This manual is a valuable resource for other physicians and health professionals, including psychologists, counselors, nurses, and occupational and rehabilitation therapists, as well as social workers and forensic and legal specialists. DSM-5-TR™ is the most definitive resource for the diagnosis and classification of mental disorders.

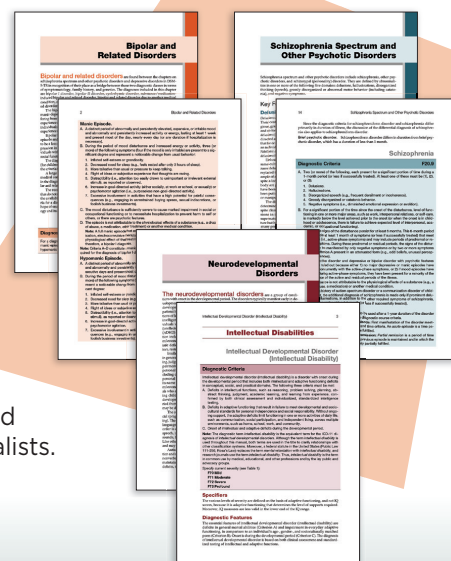

2022 • 1,142 pages • ISBN 978-0-89042-575-6 • Hardcover • \$220.00 • Item #2575

2022 • 1,142 pages • ISBN 978-0-89042-576-3 • Paperback • \$170.00 • Item #2576

2022 • 1,142 pages • ISBN 978-0-89042-577-0 • eBook • \$136.00 • Item #2577

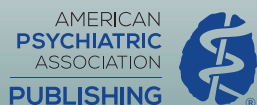

20% Discount for American Psychiatric Association Members

25% Discount for APA Resident-Fellow Members

▶ ORDER @ [www.appi.org](http://www.appi.org) | Email: [appi@psych.org](mailto:appi@psych.org) | Toll Free: 1-800-368-5777
