New!

# Diagnostic and Statistical Manual of Mental Disorders, Fifth Edition, Text Revision (DSM-5-TR™)

American Psychiatric Association

The *Diagnostic and Statistical Manual of Mental Disorders, Fifth Edition, Text Revision (DSM-5-TR)*, is the most comprehensive, current, and critical resource for clinical practice available to today's mental health clinicians and researchers. DSM-5-TR includes the fully revised text and references, updated diagnostic criteria and ICD-10-CM codes since DSM-5 was published in 2013. It features a new disorder, Prolonged Grief Disorder, as well as codes for suicidal behavior available to all clinicians of any discipline without the requirement of any other diagnosis.

With contributions from over 200 subject matter experts, this updated volume boasts the most current text updates based on the scientific literature. Now in four-color and with the ability to authenticate each printed copy, DSM-5-TR provides a cohesive, updated presentation of criteria, diagnostic codes, and text. This latest volume offers a common language for clinicians involved in the diagnosis and study of mental disorders and facilitates an objective assessment

of symptom presentations across a variety of clinical settings—inpatient, outpatient, partial hospital, consultation-liaison, clinical, private practice, and primary care.

2022 • 1,250 pages • ISBN 978-0-89042-575-6 • Hardcover • \$220.00 • Item #2575

2022 • 1,250 pages • ISBN 978-0-89042-576-3 • Paperback • \$170.00 • Item #2576

2022 • 1,250 pages • ISBN 978-0-89042-577-0 • eBook • \$136.00 • Item #2577

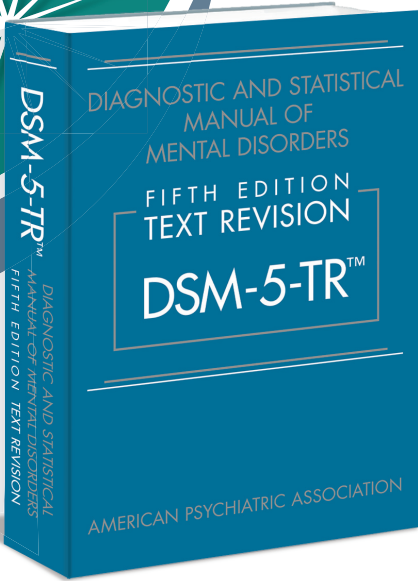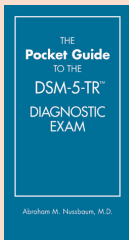

## The Pocket Guide to the DSM-5-TR® Diagnostic Exam

Abraham M. Nussbaum, M.D., M.T.S.

This book is the clinician's companion for using *DSM-5-TR™* in diagnostic interviews. Beginning with an introduction to the diagnostic interview, the *Pocket Guide* addresses the goals of the interview, provides an efficient structure for learning how to conduct one, reviews the screening questions, and then

explains the ways in which *DSM-5-TR™* impacts the interview.

2022 • 298 pages • ISBN 978-1-61537-357-4 • Paperback \$75.00 • Item #37357

2022 • 298 pages • ISBN 978-1-61537-358-1 • eBook \$60.00 • Item #37358

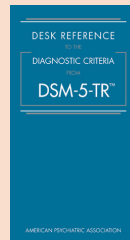

## Desk Reference to the Diagnostic Criteria from DSM-5-TR®

American Psychiatric Association

This handy reference provides quick access to the information essential to making a diagnosis. Designed to supplement *DSM-5-TR™*, this convenient guide will assist all mental health professionals as they integrate the *DSM-5-TR™* diagnostic criteria into their diagnoses.

2022 • 392 pages • ISBN 978-0-89042-579-4 • Paperback \$75.00 • Item #2579

2022 • 392 pages • ISBN 978-0-89042-580-0 • Spiralbound \$75.00 • Item #2580

2022 • 392 pages • ISBN 978-0-89042-581-7 • eBook \$60.00 • Item #2581

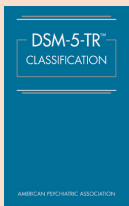

## DSM-5-TR® Classification

American Psychiatric Association

This handy *DSM-5-TR™ Classification* provides a ready reference to the DSM-5-TR classification of disorders, as well as the DSM-5-TR listings of ICD-10-CM codes for all DSM-5-TR diagnoses. To be used in tandem with DSM-5-TR™ or the *Desk Reference to the Diagnostic Criteria From DSM-5-TR™* the *DSM-5-TR™ Classification* makes

accessing the proper diagnostic codes quick and convenient.

2022 • 159 pages • ISBN 978-0-89042-583-1 • Spiralbound \$35.00 • Item #2583

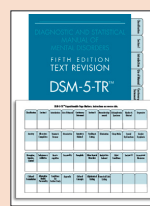

## DSM-5-TR® Repositionable Page Markers

American Psychiatric Association

The *DSM-5-TR™ Repositionable Page Markers* are designed to help you quickly and easily locate key information within DSM-5-TR™. The markers are made with a non-permanent adhesive and may be repositioned within your manual at any time.

2022 • 1 page • ISBN 978-0-89042-582-4  
Repositionable Page Markers • \$12.50 • Item #2582

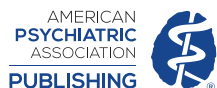

ORDER @ [www.appi.org](http://www.appi.org)  
Email: [appi@psych.org](mailto:appi@psych.org) | Toll Free: 1-800-368-5777

20% Discount for American Psychiatric Association Members  
25% Discount for APA Resident-Fellow Members

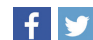

Priority Code AH2202
