SPRING 2022 | VOLUME 34 | NUMBER 2

The Journal of  
**Neuropsychiatry**  
and Clinical Neurosciences

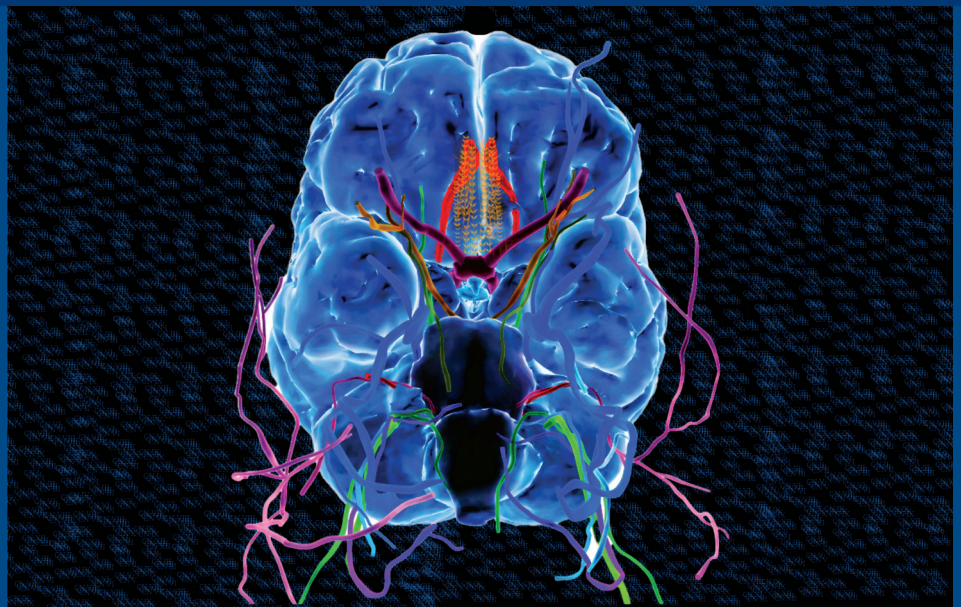

Apathy and Huntington's Disease: A Literature Review  
Based on PRISMA

Clinical Significance of Delirium With Catatonic Signs in  
Patients With Neurological Disorders

Novel Oppositional Defiant Disorder 12 Months After  
Traumatic Brain Injury in Children and Adolescents

Empathy and Impaired Socioemotional Self-Perception  
in Frontotemporal Dementia

Official Journal of the American Neuropsychiatric Association  
[neuro.psychiatryonline.org](http://neuro.psychiatryonline.org)
